# Supplementary material for: Evaluation of Heterogeneous Catalytic Ozonation Process for the Removal of Micropollutants from Water/Wastewater: Application of a Novel Pilot-Scale Continuous Flow System
Source: MDPI journal article supplement (doi:10.3390/catal13050899), 2023-05-17
Supplement: s1 [file s1]

## Supplementary Materials

for

# Evaluation of Heterogeneous Catalytic Ozonation Process for the Removal of Micropollutants from Water/Wastewater: Application of a Novel Pilot-Scale Continuous Flow System

Efthimia Kaprara <sup>1,\*</sup>, Charalampos Belesakos <sup>1</sup>, Konstantinos Kollis <sup>1</sup>, Savvina Psaltou <sup>2</sup>, Anastasios Zouboulis <sup>2</sup> and Manassis Mitrakas <sup>1</sup>

<sup>1</sup> Department of Chemical Engineering, Aristotle University of Thessaloniki, GR-54124 Thessaloniki, Greece; charalampos.belesakos@gmail.com (C.B.); kolliskonstantinos@gmail.com (K.K.); mmitraka@cheng.auth.gr (M.M.)

<sup>2</sup> Department of Chemistry, Aristotle University of Thessaloniki, GR-54124 Thessaloniki, Greece; spsaltou@chem.auth.gr (S.P.); zoubouli@chem.auth.gr (A.Z.)

\* Correspondence: kaprara@auth.gr

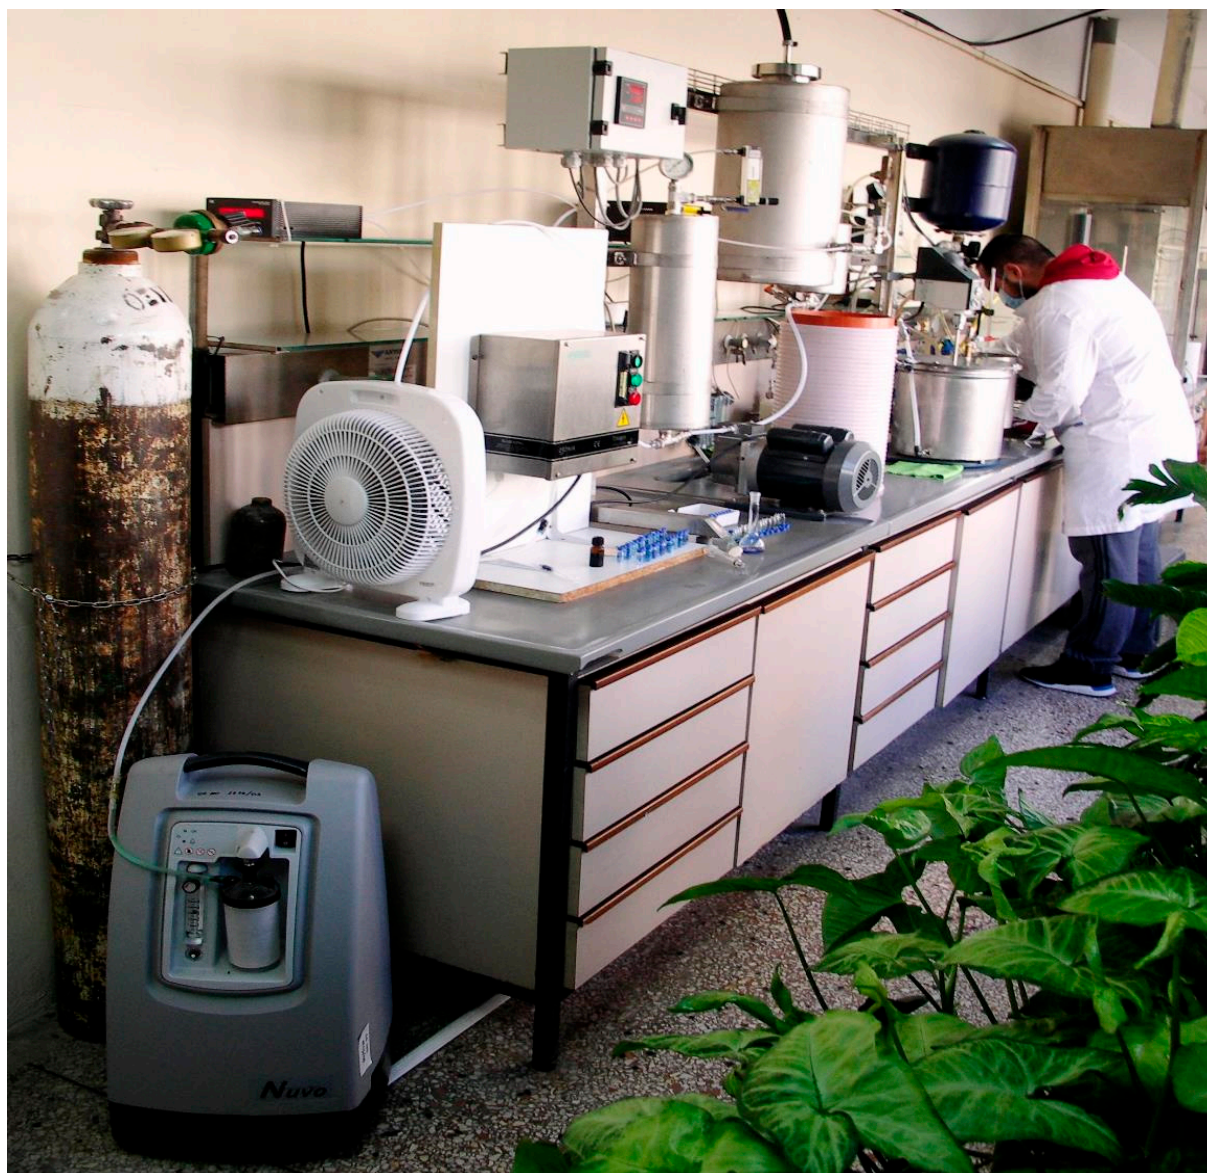

**Figure S1** Photograph of the pilot unit
